# Supplementary material
Source: PubMed Central journal article supplement (PMC8827208)
Supplement: NIHMS1764461-supplement-Appendix_A.pdf [file NIHMS1764461-supplement-Appendix_A.pdf]

**Appendix A.** List of speakers and the speaker/participant recommended reading list.

| Speaker                                                      | Paper                                                                                                                                                                                                                                                                                                                                                                                                                              |
|--------------------------------------------------------------|------------------------------------------------------------------------------------------------------------------------------------------------------------------------------------------------------------------------------------------------------------------------------------------------------------------------------------------------------------------------------------------------------------------------------------|
| Randy Jirtle, PhD<br>(Duke University)                       | <p>Jirtle RL, Skinner MK. Environmental epigenomics and disease susceptibility. <i>Nat Rev Genet</i> 2007;8:253-62.</p> <p>Luedi PP, Hartemink AJ, Jirtle RL. Genome-wide prediction of imprinted murine genes. <i>Genome Res</i> 2005;15:875-84.</p>                                                                                                                                                                              |
| Nathan Springer, PhD<br>(University of Minnesota)            | <p>Haun WJ, Springer N. Maternal and paternal alleles exhibit differential histone methylation and acetylation at maize imprinted genes. <i>Plant J</i> 2008;1-10.</p> <p>Makarevitch I, Stupar RM, Iniguez L, <i>et al.</i> Natural variation for alleles under epigenetic control by the maize chromomethylase <i>Zmet2</i>. <i>Genetics</i> 2007;177:759-60.</p>                                                                |
| Karin Michels, ScD, PhD<br>(Harvard University)              | <p>Michels KB, Fei Xue. Role of birthweight in the etiology of breast cancer. <i>Int J Cancer</i> 2006;119:2007-25.</p> <p>Xue F, Michels KB. Intrauterine factors and risk of breast cancer: a systematic review and meta-analysis of current evidence. <i>Lancet Oncol</i> 2007;8:1088-100.</p>                                                                                                                                  |
| Logan Spector, PhD<br>(University of Minnesota)              | <p>Spector LG, Xie Y, Robison LL, <i>et al.</i> Maternal diet and infant leukemia: the DNA topoisomerase II inhibitor hypothesis: a report from the children's oncology group. <i>Cancer Epidemiol Biomarkers Prev</i> 2005;14:651-5.</p> <p>Spector LG, Hooten AJ, Ross JA. Ontogeny of gene expression: a changing environment for malignancy. <i>Cancer Epidemiol Biomarkers Prev</i> 2008;17:1021-3.</p>                       |
| Joe Wiemels, PhD<br>(University of California San Francisco) | <p>Wiemels J. Chromosomal translocations in childhood leukemia: natural history, mechanisms, and epidemiology. <i>J Natl Cancer Inst Monogr</i> 2008;39:87-90.</p> <p>Wiemels J, Hofmann J, Kang M, <i>et al.</i> Chromosome 12p deletions in TEL-AML1 childhood acute lymphoblastic leukemia are associated with retrotransposon elements and occur postnatally. <i>Cancer Res</i> 2008;68:9935-44.</p>                           |
| Barry Finette, MD, PhD<br>(University of Vermont)            | <p>Finette BA. Analysis of mutagenic V(D)J recombinase mediated mutations at the HPRT locus as an in vivo model for studying rearrangements with leukemogenic potential in children. <i>DNA Repair</i> 2006;5:1049-64.</p> <p>Finette BA, Homans AC, Rivers J, Messier T, Albertini RJ. Accumulation of somatic mutations in proliferating T cell clones from children treated for leukemia. <i>Leukemia</i> 2001;15:1898-905.</p> |

|                                                                                      |                                                                                                                                                                                                                                                                                                                                                                                                                   |
|--------------------------------------------------------------------------------------|-------------------------------------------------------------------------------------------------------------------------------------------------------------------------------------------------------------------------------------------------------------------------------------------------------------------------------------------------------------------------------------------------------------------|
|                                                                                      | <p>Finette BA, Homans AC, Albertini RJ. Emergence of genetic instability in children treated for leukemia. <i>Science</i> 2000;288:514-7.</p>                                                                                                                                                                                                                                                                     |
| <p>Leena Hilakivi-Clarke, PhD<br/>(Georgetown University)</p>                        | <p>Hilakivi-Clarke L, de Assis S. Fetal origins of breast cancer. <i>Trends Endocrinol Metab</i> 2006;17:340-8.</p> <p>Hilakivi-Clarke L, Clarke R, Onojafe I, Raygada M, Cho E, Lippman M. A maternal diet high in n - 6 polyunsaturated fats alters mammary gland development, puberty onset, and breast cancer risk among female rat offspring. <i>Proc Natl Acad Sci USA</i> 1997;94:9372-7.</p>              |
| <p>John Kersey, MD<br/>(University of Minnesota)</p>                                 | <p>Chen W, Li Q, Hudson WA, Kumar A, Kirchhof N, Kersey JH. A murine Mll-AF4 knock-in model results in lymphoid and myeloid deregulation and hematologic malignancy. <i>Blood</i> 2006;108:669-77.</p> <p>Chen W, Kumar AR, Hudson WA, <i>et al.</i> Malignant transformation initiated by Mll-AF9: gene dosage and critical target cells. <i>Cancer Cell</i> 2008;13:432-40.</p>                                 |
| <p>James Amatruda, MD, PhD<br/>(University of Texas Southwestern Medical Center)</p> | <p>Chen B, Dodge ME, Tang W, <i>et al.</i> Small molecule-mediated disruption of Wnt-dependent signaling in tissue regeneration and cancer. <i>Nat Chem Biol</i> 2009;5:100-7.</p> <p>Shepard JL, Amatruda JF, Finkelstein D, <i>et al.</i> A mutation in separase causes genome instability and increased susceptibility to epithelial cancer. <i>Genes Dev</i> 2007;21:55-9.</p>                                |
| <p>Anja Katrin Bielinsky, PhD<br/>(University of Minnesota)</p>                      | <p>Raveendranathan M, Chattopadhyay S, Bolon YT, Haworth J, Clarke DJ, Bielinsky AK. Genome-wide replication profiles of S-phase checkpoint mutants reveal fragile sites in yeast. <i>EMBO J</i> 2006;25:3627-39.</p> <p>Chattopadhyay S, Bielinsky AK. Human Mcm10 regulates the catalytic subunit of DNA polymerase-alpha and prevents DNA damage during replication. <i>Mol Biol Cell</i> 2007;18:4085-95.</p> |
| <p>Julie Ross, PhD<br/>(University of Minnesota)</p>                                 | <p>Ross JA, Blair CK, Olshan AF, <i>et al.</i> Periconceptional vitamin use and leukemia risk in children with Down syndrome: a Children's Oncology Group study. <i>Cancer</i> 2005;104:405-10.</p> <p>Johnson KJ, Spector LG, Klebanoff MA, Ross JA. Childhood cancer and birthmarks in the Collaborative Perinatal Project. <i>Pediatrics</i> 2007; 119:e1088-93.</p>                                           |
| <p>David Largaespada, PhD<br/>(University of Minnesota)</p>                          | <p>Collier LS, Carlson CM, Ravimohan S, Dupuy AJ, Largaespada DA. Cancer gene discovery in solid tumours using transposon-based somatic mutagenesis in the mouse. <i>Nature</i> 2005;436:272-6.</p> <p>Kim A, Morgan K, Hasz DE, <i>et al.</i> Beta common receptor inactivation attenuates myeloproliferative disease in Nf1 mutant mice. <i>Blood</i> 2007;</p>                                                 |

|                                                                   |                                                                                                                                                                                                                                                                                                                                                                                                                               |
|-------------------------------------------------------------------|-------------------------------------------------------------------------------------------------------------------------------------------------------------------------------------------------------------------------------------------------------------------------------------------------------------------------------------------------------------------------------------------------------------------------------|
|                                                                   | 109:1687-91.                                                                                                                                                                                                                                                                                                                                                                                                                  |
| Jaime Modiano, VMD, PhD<br>(University of Minnesota)              | <p>Modiano JF, Breen M, Burnett RC, <i>et al.</i> Distinct B-cell and T-cell lymphoproliferative disease prevalence among dog breeds indicates heritable risk. <i>Cancer Res</i> 2005;65:5654-61.</p> <p>Breen M, Modiano JF. Evolutionarily conserved cytogenetic changes in hematological malignancies of dogs and humans--man and his best friend share more than companionship. <i>Chromosome Res</i> 2008;16:145-54.</p> |
| Andrew Olshan, PhD<br>(University of North Carolina, Chapel Hill) | <p>Olshan AF, Smith JC, Bondy ML, Neglia JP, Pollock BH. Maternal vitamin use and reduced risk of neuroblastoma. <i>Epidemiology</i> 2002; 13:575-80.</p> <p>Olshan AF, Shaw GM, Millikan RC, Laurent C, Finnell RH. Polymorphisms in DNA repair genes as risk factors for spina bifida and orofacial clefts. <i>Am J Med Genet A</i> 2005;135:268-73.</p>                                                                    |
